# Supplementary material
Source: MDPI journal article supplement (https://www.mdpi.com/2311-7524/10/2/176)
Supplement: s1 [file s1]

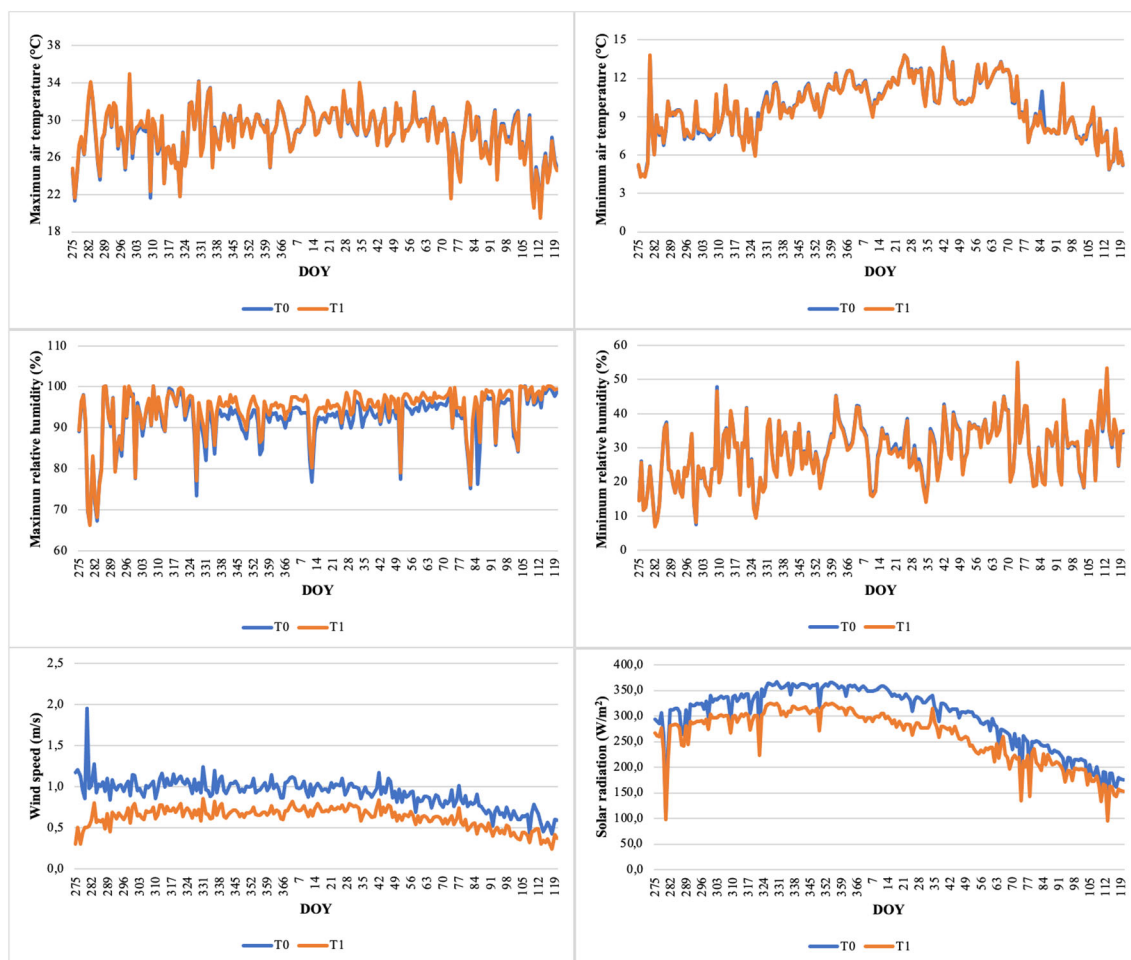

Supplementary Figure S1. Daily measurement of climatic variables for the growing season (October 2020 - April 2021). (a) Maximum air temperature (°C); (b) Minimum air temperature (°C); (c) Maximum relative humidity (%); (d) Minimum relative humidity (%); (e) Wind speed (m/s); and (f) Solar radiation (W/m<sup>2</sup>).

Supplementary Table S1. Yield, yield components and maturity for table grape cv INIA-G2, without mesh (T0) and under mesh (T1), 2020-21 season.

| Treatment              | Bunch weight (g) | Nº bunch per plant | Yield (kg/plant) | Yield (Ton/ha) | Total soluble solids (°Brix) | Titrateable acidity (%) |
|------------------------|------------------|--------------------|------------------|----------------|------------------------------|-------------------------|
| T0                     | 617              | 37                 | 23               | 37.9           | 20.2                         | 0.83                    |
| T1                     | 638              | 39                 | 25               | 40.9           | 20.0                         | 0.79                    |
| Significance (p-value) | 0.59             | 0.49               | 0.40             | 0.44           | 0.43                         | 0.39                    |
